# Supplementary material for: Polyimide-derived graphite barrier layer adhered to seed crystals to improve the quality of grown silicon carbide
Source: Royal Society of Chemistry journal article supplement (doi:10.1039/d2ra02868a), 2022-01-01
Supplement: d2ra02868a1.pdf [file d2ra02868a1.pdf]

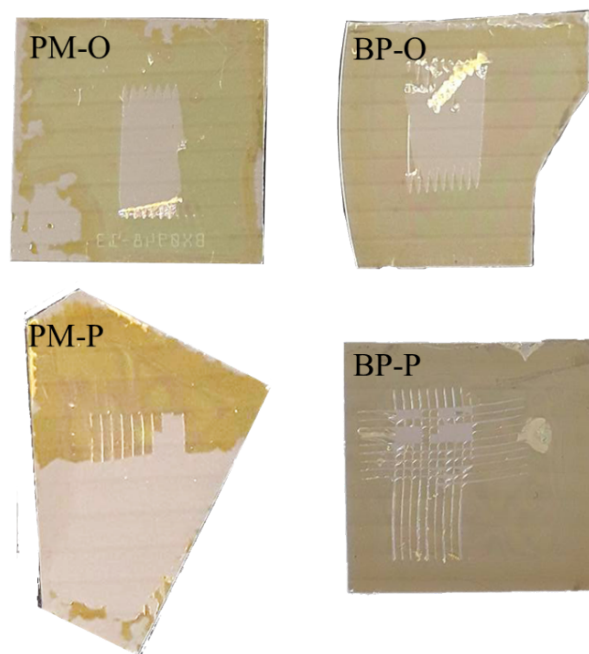

Fig. S1 Photos of a series of PI coatings on SiC after cross-cut adhesion tests.

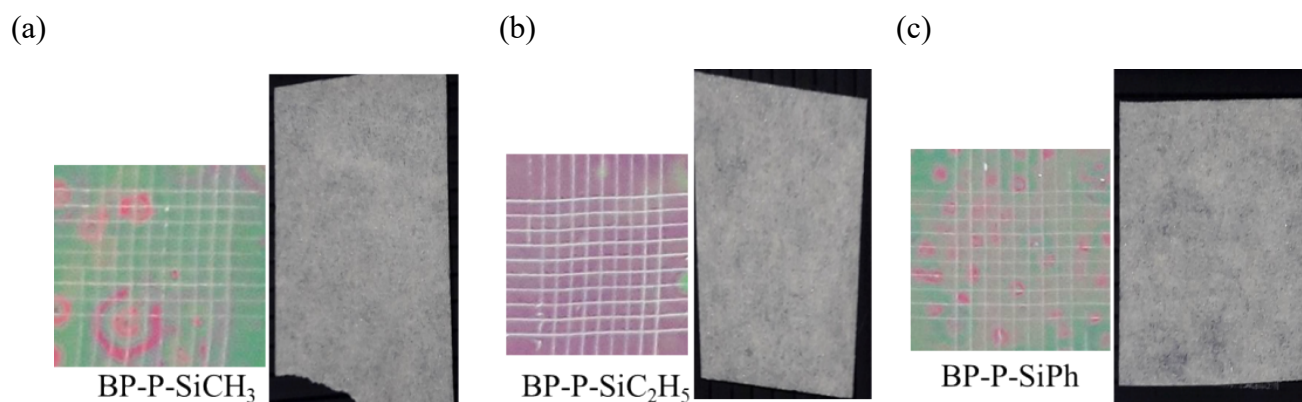

Fig. S2 Photos of PI-silane hybrid coatings, (a) BP-P-SiCH<sub>3</sub>, (b) BP-P-SiC<sub>2</sub>H<sub>5</sub>, and (c) BP-P-SiPh, on SiC substrates (Left) and their corresponding adhesive tapes (Right) after cross-cut adhesion tests.

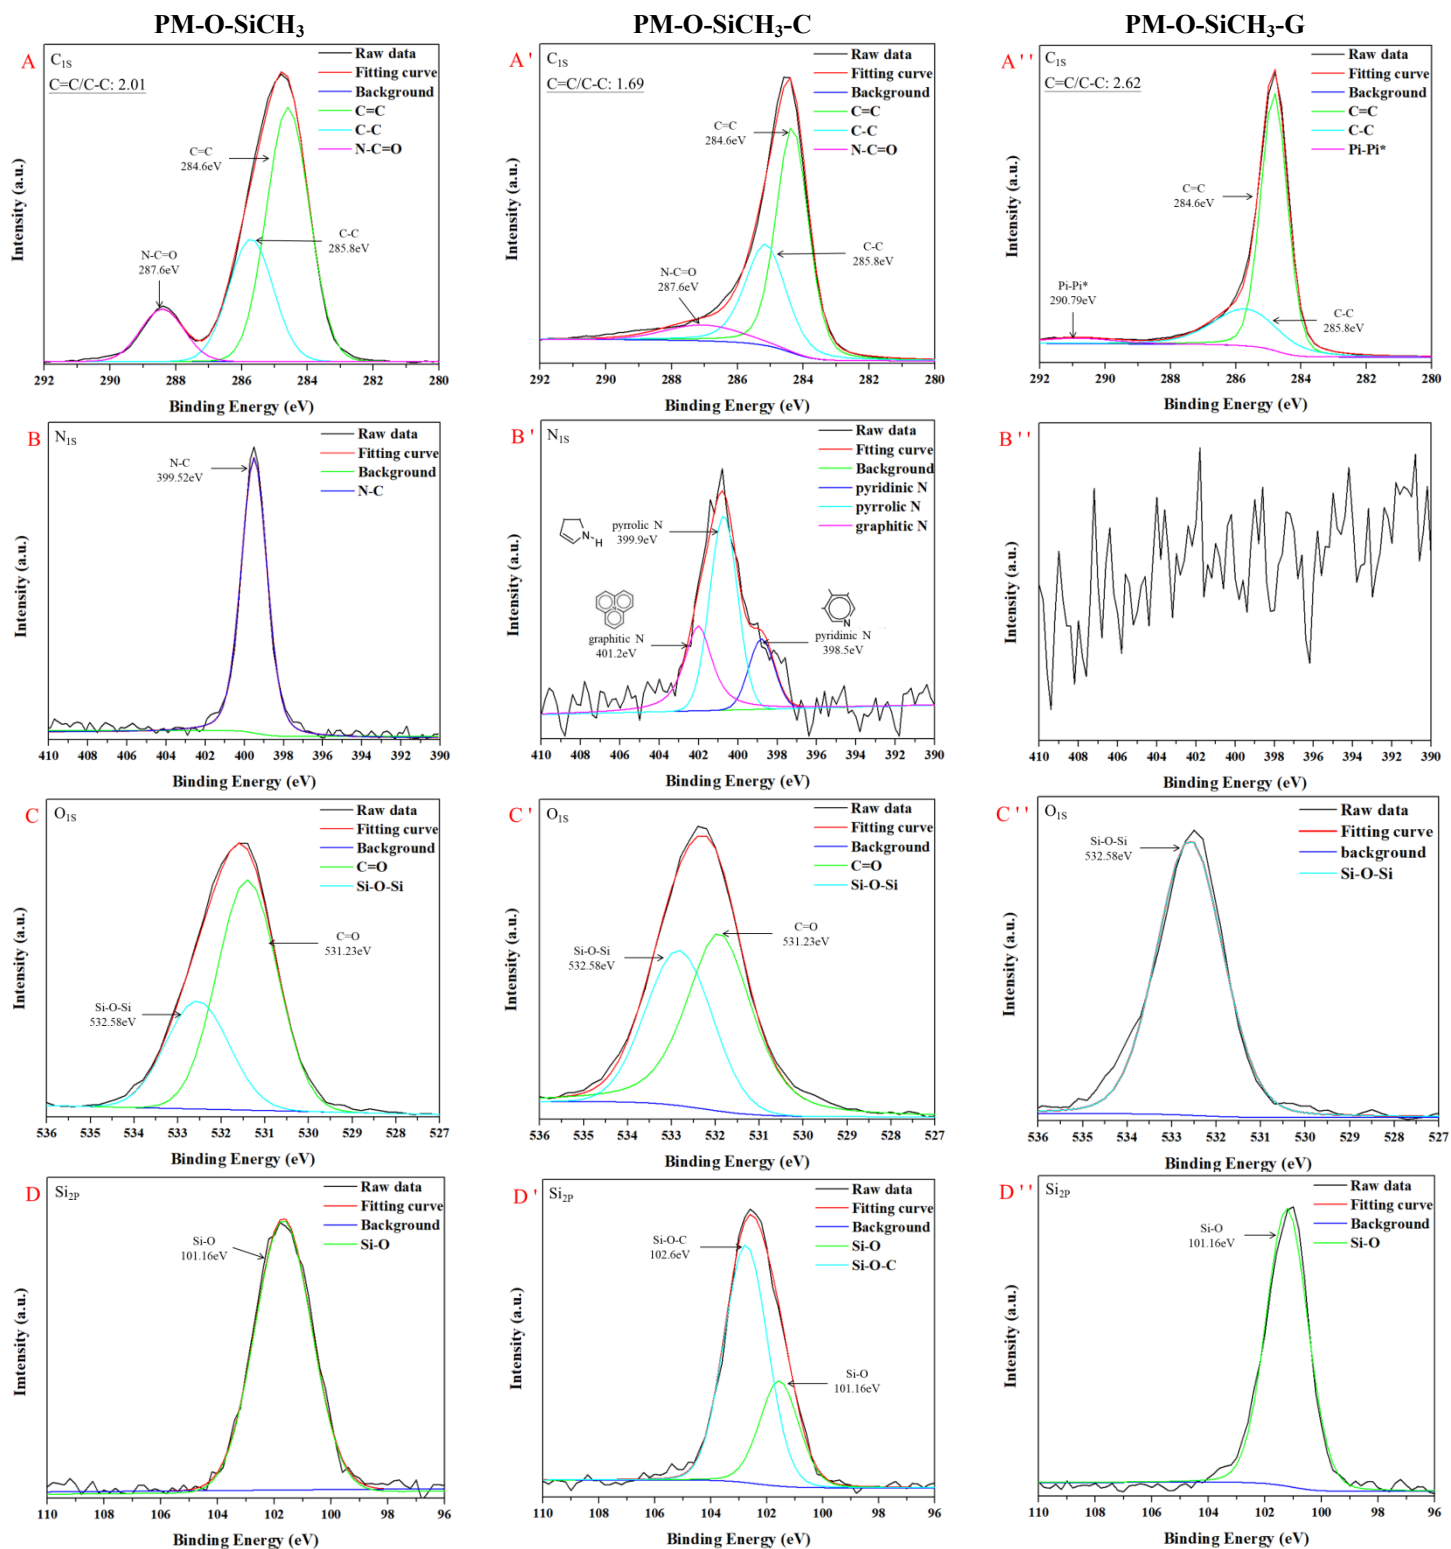

Fig. S3 High resolution XPS spectra in (A, A', A'') C<sub>1s</sub>, (B, B', B'') N<sub>1s</sub>, (C, C', C'') O<sub>1s</sub>, (D, D', D'') Si<sub>2p</sub> regions for (A, B, C, D) PM-O-SiCH<sub>3</sub>, (A', B', C', D') PM-O-SiCH<sub>3</sub>-C and (A'', B'', C'', D'') PM-O-SiCH<sub>3</sub>-G.

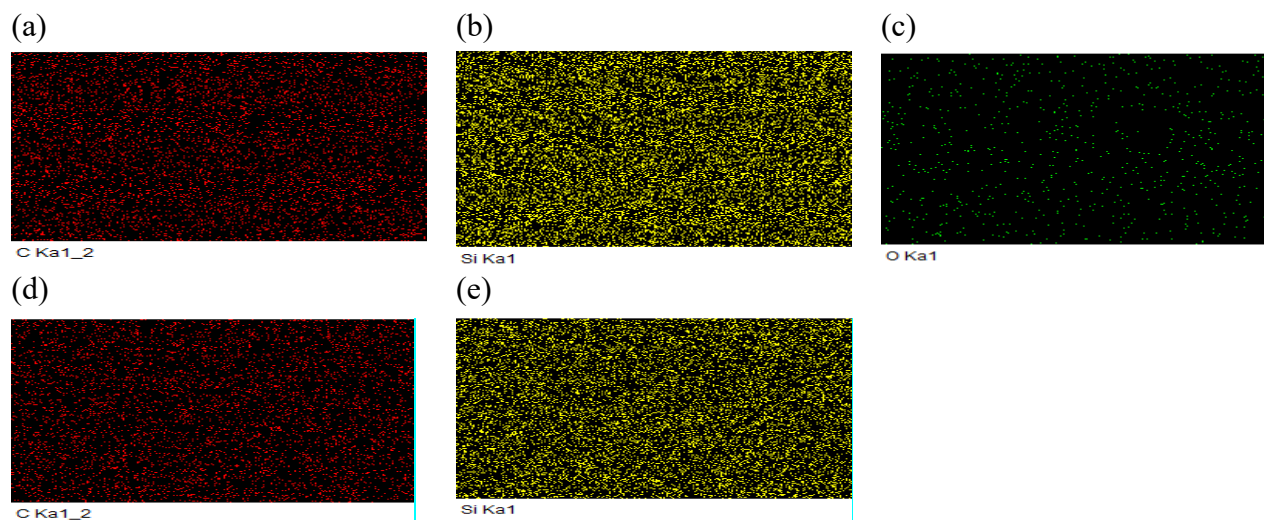

Fig. S4 SEM-EDS elemental mapping results of (a, d) C, (b, e) Si, and (c) O from (a-c) PM-O-SiCH<sub>3</sub>-C and (d, e) PM-O-SiCH<sub>3</sub>-G coatings on SiC.
